# Supplementary material for: A Bifunctional-Modulated Conformal Li/Mn-Rich Layered Cathode for Fast-Charging, High Volumetric Density and Durable Li-Ion Full Cells
Source: PubMed Central journal article supplement (PMC8089071; doi:10.1007/s40820-021-00643-1), 2021-05-02
Supplement: 40820_2021_643_MOESM1_ESM.pdf [file 40820_2021_643_MOESM1_ESM.pdf]

Supporting Information for

## **A Bifunctional-Modulated Conformal Li/Mn-Rich Layered Cathode for Fast-Charging, High Volumetric Density and Durable Li-Ion Full Cells**

Zedong Zhao<sup>1, ‡</sup>, Minqiang Sun<sup>1, ‡</sup>, Tianqi Wu<sup>1</sup>, Jiajia Zhang<sup>1</sup>, Peng Wang<sup>1</sup>, Long Zhang<sup>1</sup>, Chongyang Yang<sup>3, \*</sup>, Chengxin Peng<sup>2, 4, \*</sup>, Hongbin Lu<sup>1, \*</sup>

<sup>1</sup>State Key Laboratory of Molecular Engineering of Polymers, Department of Macromolecular Science, Collaborative Innovation Center of Polymers and Polymer Composites, Fudan University, 2005 Songhu Road, Shanghai 200438, P. R. China

<sup>2</sup>School of Materials Science & Engineering, University of Shanghai for Science and Technology, Shanghai 200093, P. R. China

<sup>3</sup>National Engineering Research Center for Supercapacitor for Vehicles, Shanghai Aowei Technology Development Co., Ltd., Shanghai 201203, P. R. China

<sup>4</sup>Key Laboratory of Advanced Energy Materials Chemistry (Ministry of Education), College of Chemistry, Nankai University, Tianjin 300071, P. R. China

<sup>‡</sup>Zedong Zhao and Minqiang Sun contributed equally to this work.

\*Corresponding authors. E-mail: [hongbinlu@fudan.edu.cn](mailto:hongbinlu@fudan.edu.cn) (Hongbin Lu); [cypeng@usst.edu.cn](mailto:cypeng@usst.edu.cn) (Chengxin Peng); [ycy6142@sina.com](mailto:ycy6142@sina.com) (Chongyang Yang)

### **S1 Li<sup>+</sup> Diffusion Coefficient ( $D_{Li^+}$ )**

The relationship between peak current ( $I_p$ ) and scan rate ( $\nu$ ) is described by Randles-Sevcik equation as follows:

$$I_p = 2.69 \cdot 10^5 n^{3/2} A D^{1/2} \nu^{1/2} C$$

where  $n$  is the number of electrons transferred per mole of molecule,  $A$  is the active surface area per unit mass of electrode ( $\text{cm}^2 \text{g}^{-1}$ ),  $C$  is the initial concentration of  $\text{Li}^+$  in MNC crystal ( $\text{mol cm}^{-3}$ ), which is deemed as the same for MNC and GCNT@ST-MNC;  $D$  is the  $\text{Li}^+$  diffusion coefficient ( $\text{cm}^2 \text{s}^{-1}$ ).

### **S2 Capacitance Contribution**

The reaction kinetics is analyzed by CV scan at various rates from 0.2 to 2  $\text{mV s}^{-1}$  according to the following equation:

$$i(V) = k_1 \nu + k_2 \nu^{1/2}$$

where  $\nu$  is scan rate,  $k_1 \nu$  represents surface capacitance-controlled contribution, and  $k_2 \nu^{1/2}$  denotes diffusion-controlled contribution. The above equation can be converted into:

$$i(V)/\nu^{1/2} = k_1 \nu^{1/2} + k_2$$

Thus, the value of  $k_1$  and  $k_2$  can be determined by plotting  $i(V)/v^{1/2}$  vs.  $v^{1/2}$ . And  $k_1$  and  $k_2$  are constant at the fixed voltage.

### S3 Calculation of Energy/Power Densities

The energy density ( $E$ , Wh  $\text{kg}^{-1}$ ) and power density ( $P$ , W  $\text{kg}^{-1}$ ) for the full cell can be calculated using the following equations:

$$E = Q \cdot V$$

$$P = 3600 E / dt$$

in which  $Q$  (mAh  $\text{g}^{-1}$ ) is the specific capacity of full cell,  $V$  (V) is the operating voltage on average, and  $dt$  (s) is the discharge time.

### S4 Supplementary Tables and Figures

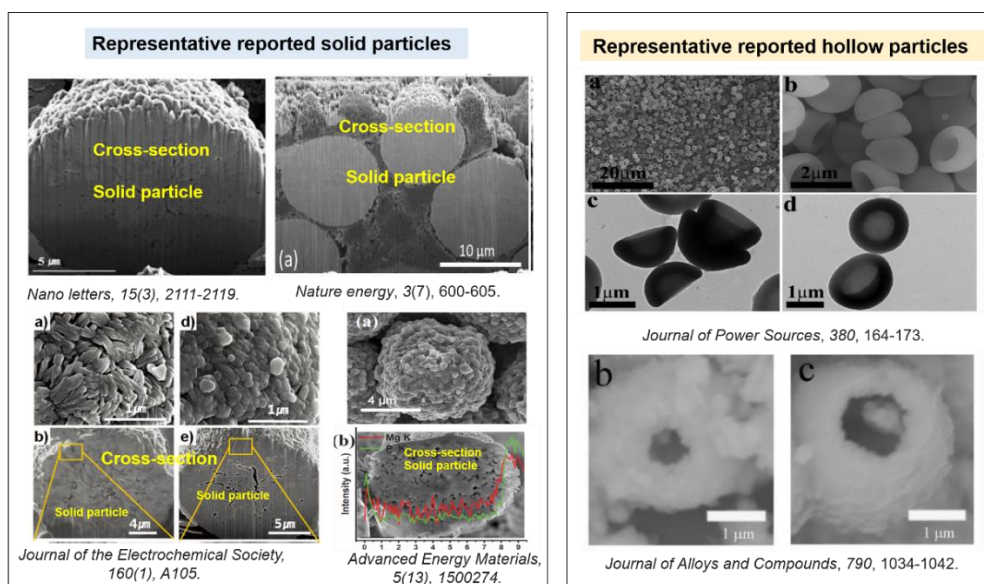

**Fig. S1** Morphology and structure comparison of the solid and completely hollow-structured particles reported in references

We define the semi-hollow structure by comparing the morphology difference between the solid and completely hollow-structured particles. Figure S1(left) shows that nearly no cavities are present within the solid particles, indicating that the  $\text{Li}^+$  diffusion is hindered obviously inside the particle, especially at high charge/discharge rates. Also, such solid particles might suffer from cracking and structure collapse during cycling, leading to fast electrode deterioration. Besides, compared with the completely hollow-structured spheres as shown in Fig. S1(right), the secondary particle packing density in the semi-hollow structure is higher in the core, thus higher tap density than the completely hollow structure. The above comparison clearly demonstrates the morphology difference among solid particles, completely hollow and semi-hollow structures.

## Nano-Micro Letters

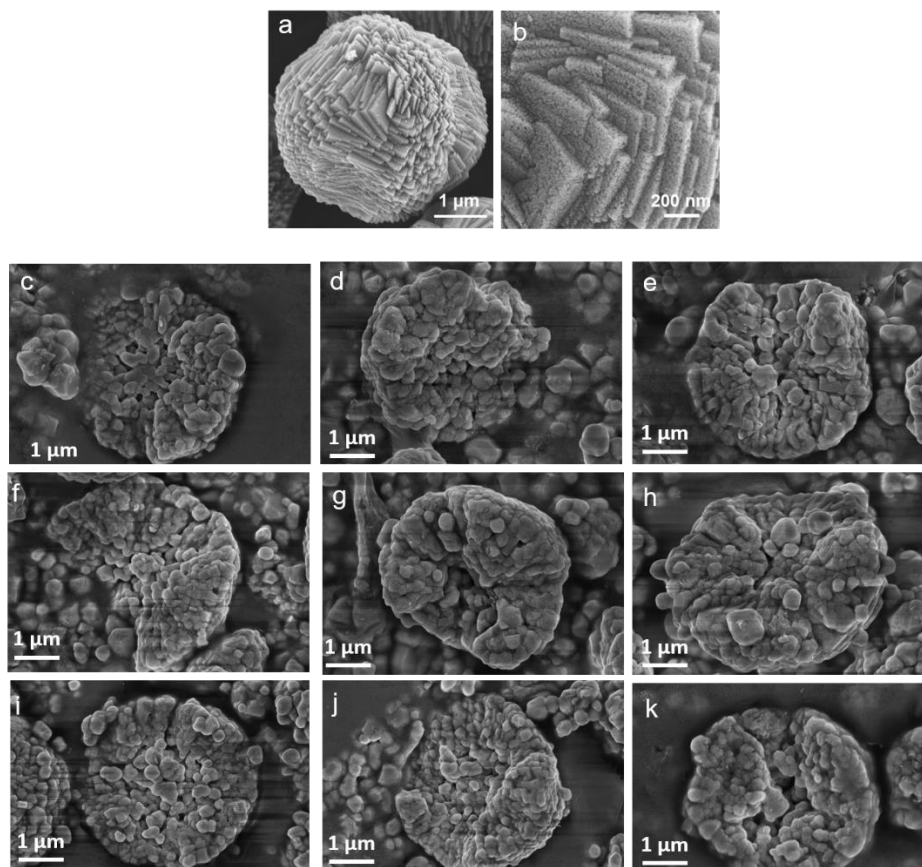

**Fig. S2** FE-SEM images of MnO<sub>2</sub> with (a) low and (b) high magnification. (c-k) 9 arbitrary SEM images further showed the similar semi-hollow structures

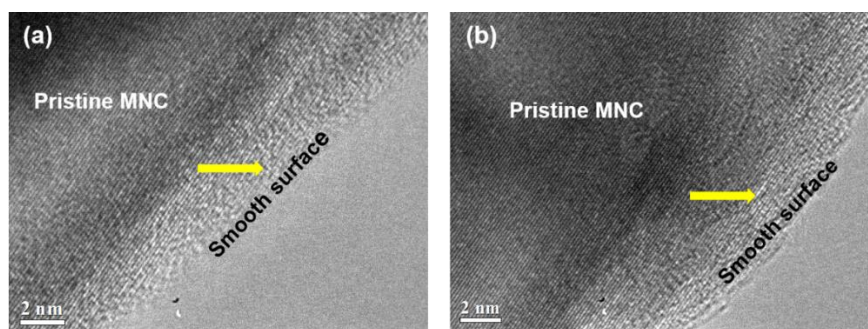

**Fig. S3** (a-b) HRTEM images of the pristine MNC

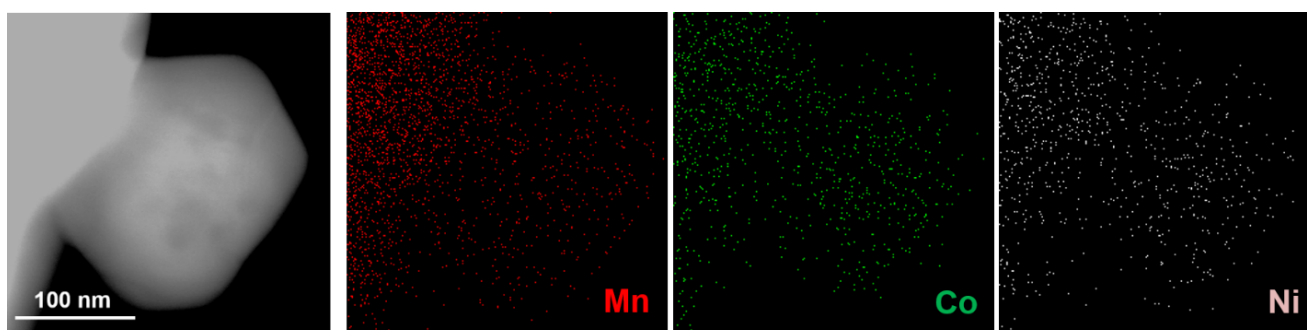

**Fig. S4** EDS mapping of MNC

**Table S1** Molar ratio of Li, Mn, Ni and Co for inductively coupled plasma (ICP) measurement

|        | Li    | Mn    | Ni    | Co    | Co: (Mn+Ni) |
|--------|-------|-------|-------|-------|-------------|
| MNC    | 1.233 | 0.505 | 0.130 | 0.128 | 0.20: 1     |
| ST-MNC | 1.333 | 0.509 | 0.130 | 0.289 | 0.45: 1     |

EDS mapping analysis of ST-MNC reveals a relatively higher Co content across the surface region than MNC (Figs. 2e-g and S2). This is also consistent with the results of inductively coupled plasma (ICP) measurement (Table S1). The molar ratio of Li: Mn: Ni: Co is found to be 1.23: 0.51: 0.13: 0.13 for MNC, which well matches the  $\text{Li}_{1.2}\text{Mn}_{0.54}\text{Ni}_{0.13}\text{Co}_{0.13}\text{O}_2$  as expected. Moreover, the Co: (Mn+Ni) molar ratio of ST-MNC is 0.45: 1, larger than that (0.20: 1) of MNC, which suggests the Co-rich surface for ST-MNC and keeps good accordance with EDS mapping analysis.

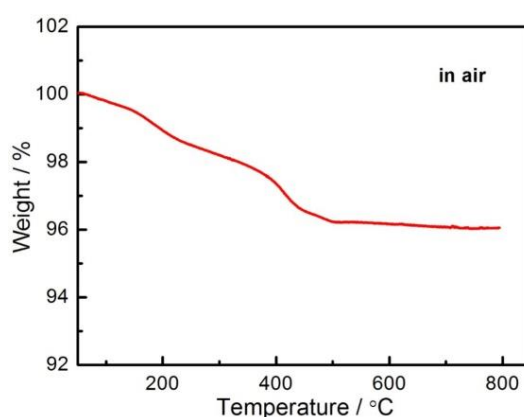**Fig. S5** TGA curve of GCNT@ST-MNC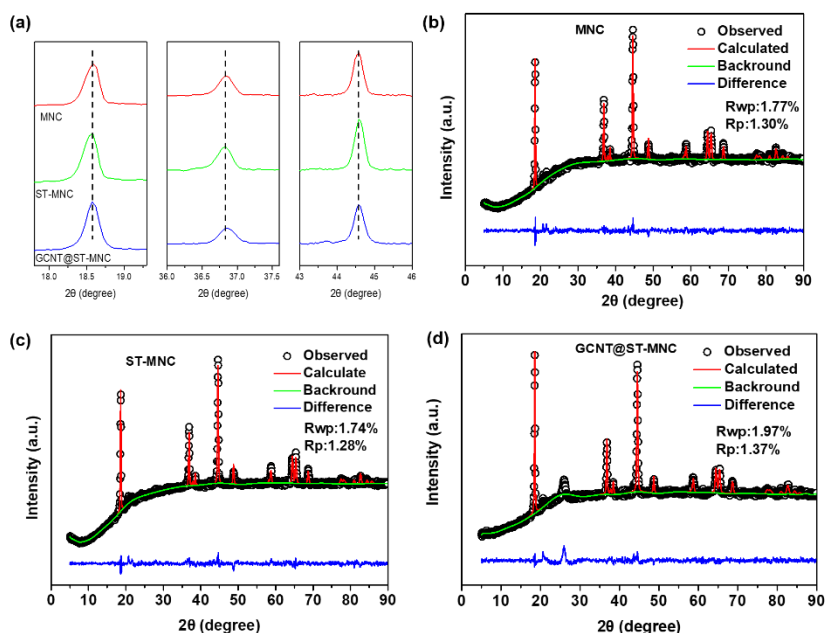

**Fig. S6** (a) Enlarged main XRD peaks. The Rietveld refinement of XRD data of (b) pristine MNC, (c) ST-MNC and (d) GCNT@ST-MNC powders. The XRD analysis indicated negligible difference between these three samples.

| Sample      | a [Å]  | c [Å]   | c/a   | d (003)/[Å] | d (104) /[Å] |
|-------------|--------|---------|-------|-------------|--------------|
| MNC         | 2.8508 | 14.2407 | 4.995 | 4.746       | 2.036        |
| ST-MNC      | 2.8501 | 14.2402 | 4.996 | 4.743       | 2.035        |
| GCNT@ST-MNC | 2.8502 | 14.2403 | 4.996 | 4.744       | 2.034        |

**Fig. S7** Structural data obtained from the Rietveld refined XRD

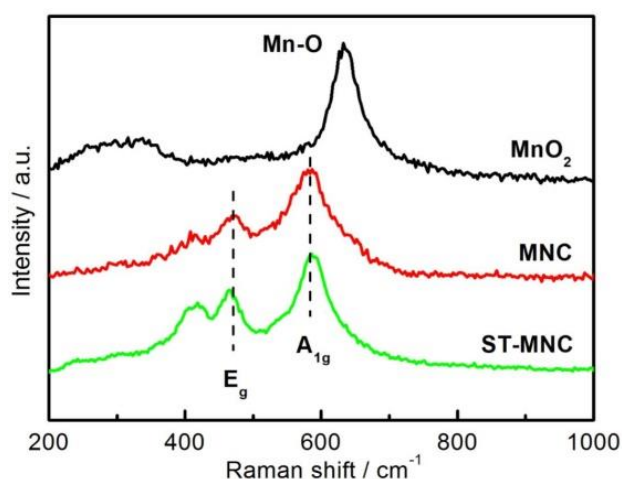

**Fig. S8** Raman spectra of MnO<sub>2</sub>, MNC and ST-MNC

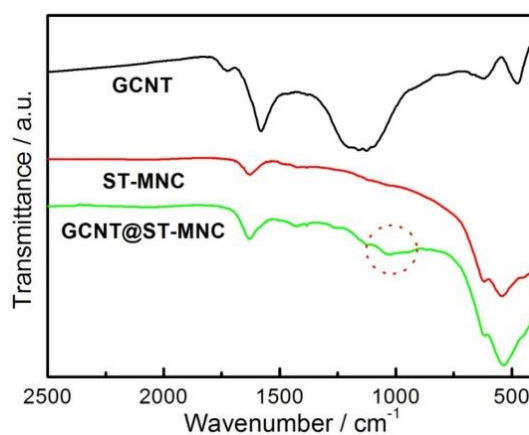

**Fig. S9** FTIR spectra of GCNT, ST-MNC and GCNT@ST-MNC

In FTIR spectrum of ST-MNC, two characteristic peaks are observed at 537 and 618  $\text{cm}^{-1}$ , which are derived from the stretching vibration of M-O. For the GCNT, the main absorption peaks include 1726  $\text{cm}^{-1}$  (C=O in carboxyl), 1580  $\text{cm}^{-1}$  (C=C in aromatic ring), 1200  $\text{cm}^{-1}$  (C-O in carboxyl), 1158  $\text{cm}^{-1}$  (C-O in C-OH) and 1092  $\text{cm}^{-1}$  (C-O-C in epoxy group). After coating GCNT onto ST-MNC, the C=O peak at 1726  $\text{cm}^{-1}$  and broad peaks between 1050 and 1250  $\text{cm}^{-1}$  are absent while a new peak appears at 1027  $\text{cm}^{-1}$  (as marked by red circle). This result verifies that the C-O-C and C-OH groups are broken down and the fresh C-O-M bond is generated between ST-MNC and GCNT.



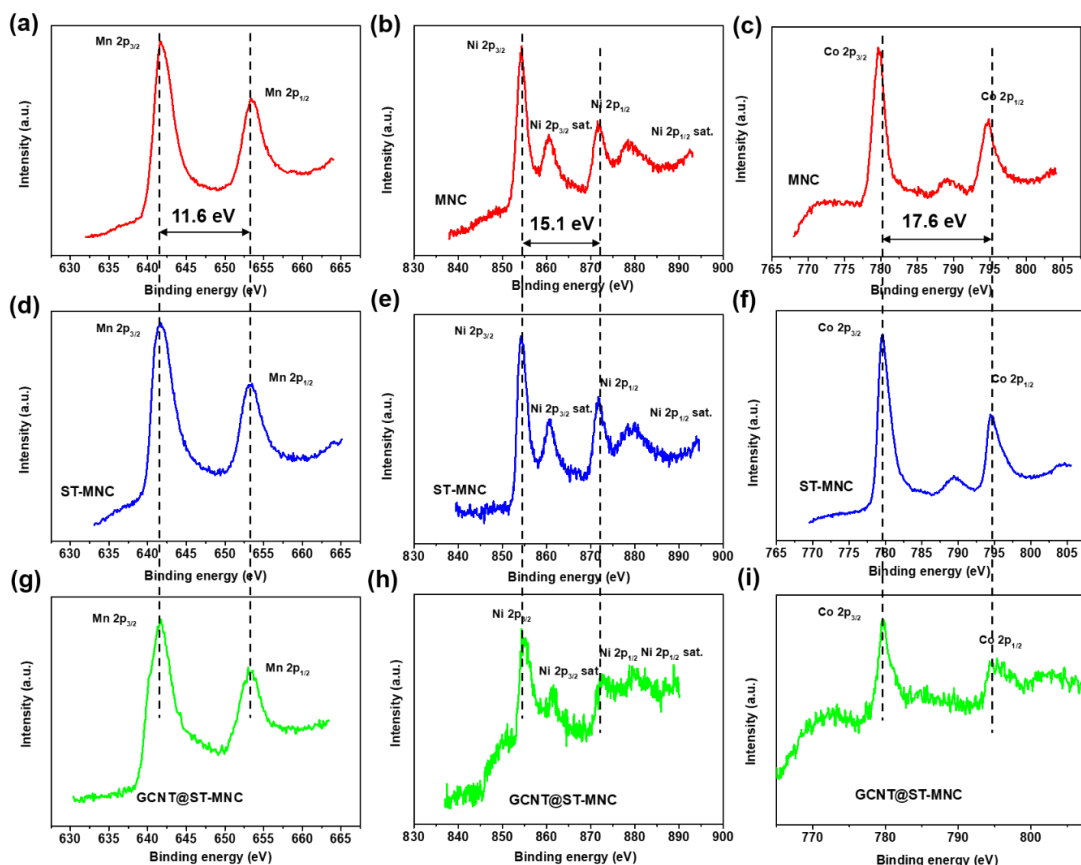

**Fig. S10** XPS spectra of (a, d and g) Mn 2p, (b, e and h) Ni 2p, (c, f and i) Co 2p survey spectra for the MNC, ST-MNC and GCNT@ST-MNC

The valence state analysis of each TM is as follows. The Mn 2p spectrum (Fig. S10a, d and g) for three samples was deconvoluted into two peaks of  $2p_{3/2}$  at 642 eV and  $2p_{1/2}$  at 653.6 eV with a spin-energy separation of 11.6 eV, which is attributed to predominant presence of  $\text{Mn}^{4+}$  species. In the Co 2p spectrum (Fig. S10b, e and h), the binding energies of  $2p_{3/2}$  and  $2p_{1/2}$  peaks are 779.3 and 794.4 eV with the separation of 15.1 eV, respectively, indicating  $\text{Co}^{3+}$  valence state in the three samples. Similarly, the energy separation in Ni 2p spectrum (Fig. S10c, f and i) is 17.6 eV, corresponding to  $\text{Ni}^{2+}$  valence state. No obvious change in oxidation state for Mn, Ni and Co is identified in these three samples.

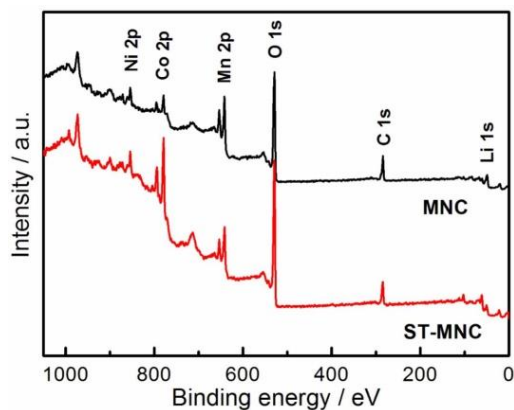

**Fig. S11** Survey XPS spectra of MNC and ST-MNC

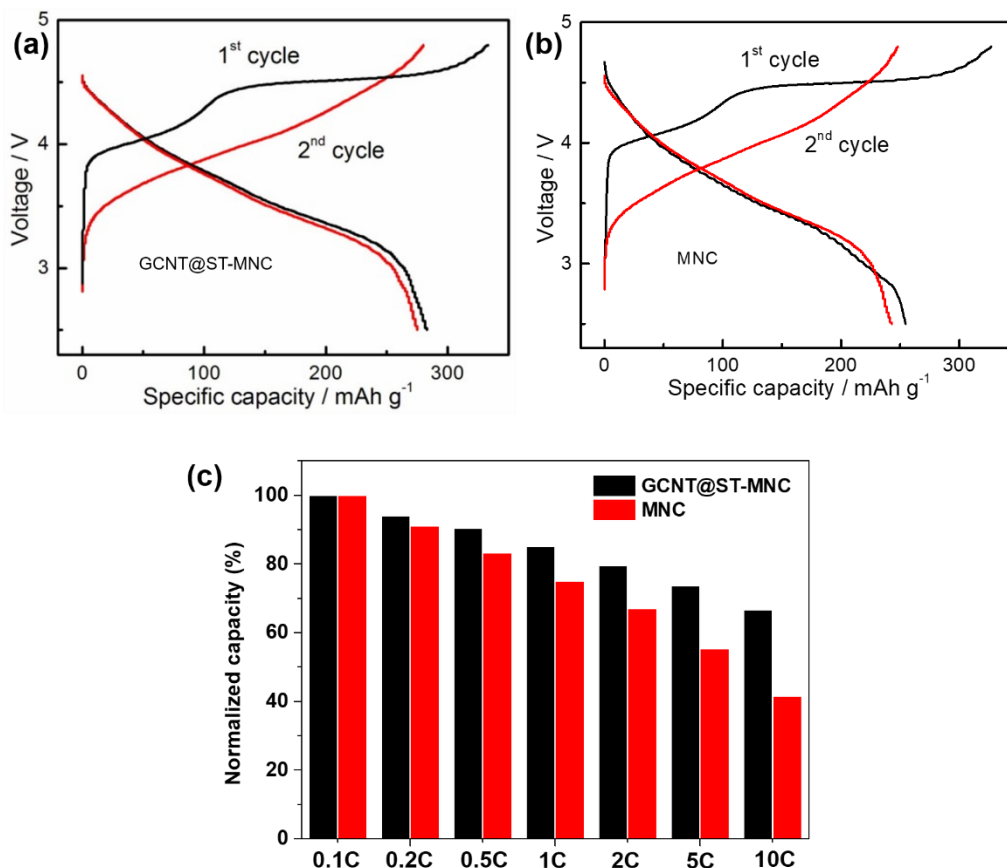

**Fig. S12 (a-b)** Galvanostatic charge/discharge curves of GCNT@ST-MNC with 1<sup>st</sup> and 2<sup>nd</sup> cycle at 0.1 C. **(c)** Normalized capacity of GCNT@ST-MNC and MNC

**Table S2** Comparison of the electrochemical performance of half cells based on GCNT@ST-MNC and other recently reported LiMO<sub>2</sub> and LMR oxides

| Cathode materials                                                                                                                  | Specific capacity (mAh g <sup>-1</sup> ) | Rate capability     | Cycle performance                    | Refs.            |
|------------------------------------------------------------------------------------------------------------------------------------|------------------------------------------|---------------------|--------------------------------------|------------------|
| <b>GCNT@ST-MNC</b>                                                                                                                 | <b>275</b><br><b>(0.1 C, 2.5-4.8 V)</b>  | <b>65.5% (10 C)</b> | <b>94.5%</b><br><b>(1000 cycles)</b> | <b>This work</b> |
| Surface treated<br>LiNi <sub>0.6</sub> Co <sub>0.2</sub> Mn <sub>0.2</sub> O <sub>2</sub>                                          | 200<br>(1 C, 2.75-4.4 V)                 | /                   | 85%<br>(150 cycles)                  | [51]             |
| LiNi <sub>0.33</sub> Mn <sub>0.33</sub> Co <sub>0.33</sub> O <sub>2</sub>                                                          | 205<br>(0.1 C, 2.7-4.7 V)                | /                   | 68.3%<br>(100 cycles)                | [52]             |
| LiNi <sub>0.4</sub> Mn <sub>0.4</sub> Co <sub>0.2</sub> O <sub>2</sub> -<br>SWNT                                                   | 160<br>(0.5 C, 2.5-4.5 V)                | 71.8% (5 C)         | 92%<br>(500 cycles)                  | [48]             |
| Al <sub>2</sub> O <sub>3</sub> coated<br>LiNi <sub>0.4</sub> Mn <sub>0.4</sub> Co <sub>0.2</sub> O <sub>2</sub> -CNT               | 160<br>(0.5 C, 2.5-4.5 V)                | 62.5% (5 C)         | 93%<br>(500 cycles)                  | [21]             |
| rGO coated<br>0.4Li <sub>2</sub> MnO <sub>3</sub> •0.6LiNi <sub>0.33</sub><br>Co <sub>0.33</sub> Mn <sub>0.33</sub> O <sub>2</sub> | 250<br>(0.1 C, 2-4.6 V)                  | 60% (12 C)          | 94.6%<br>(100 cycles)                | [19]             |

|                                                                                                                        |                                          |                                 |                            |      |
|------------------------------------------------------------------------------------------------------------------------|------------------------------------------|---------------------------------|----------------------------|------|
| AlF <sub>3</sub> -coated<br>Li <sub>1.2</sub> Ni <sub>0.15</sub> Co <sub>0.1</sub> Mn <sub>0.55</sub> O <sub>2</sub>   | 250<br>(0.1 C, 2-4.7 V)                  | /                               | ~100%<br>(100 cycles)      | [23] |
| AlF <sub>3</sub> -coated<br>Li <sub>1.19</sub> Ni <sub>0.16</sub> Co <sub>0.08</sub> Mn <sub>0.57</sub> O <sub>2</sub> | 245<br>(0.08 C, 2-4.6 V)                 | 56% (5 C)                       | 91.6%<br>(100 cycles)      | [27] |
| TiO <sub>2</sub> -coated<br>Li <sub>1.2</sub> Ni <sub>0.13</sub> Mn <sub>0.54</sub> Co <sub>0.13</sub> O <sub>2</sub>  | 310 (55 °C)<br>(0.1 C, 2-4.8 V)          | /                               | 70% (55 °C)<br>(50 cycles) | [49] |
| Li <sub>1.2</sub> Ni <sub>0.15</sub> Co <sub>0.1</sub> Mn <sub>0.55</sub> O <sub>2</sub>                               | 252<br>(21 mA g <sup>-1</sup> , 2-4.8 V) | 47.6% (460 mA g <sup>-1</sup> ) | 98.4%<br>(75 cycles)       | [50] |

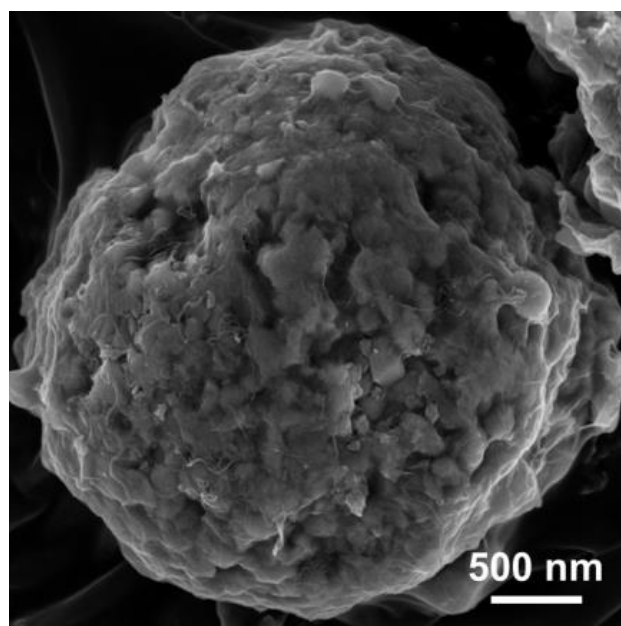

Fig. S13 FE-SEM image of GCNT@ST-MNC after 1000 cycles

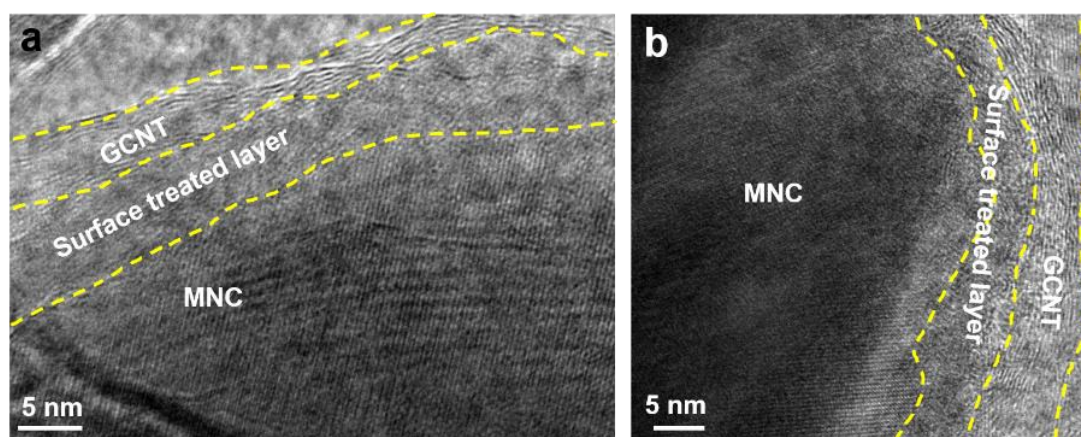

Fig. S14 The HRTEM images of the GCNT@ST-MNC after 200 (a) and 500 (b) cycles at 0.1C



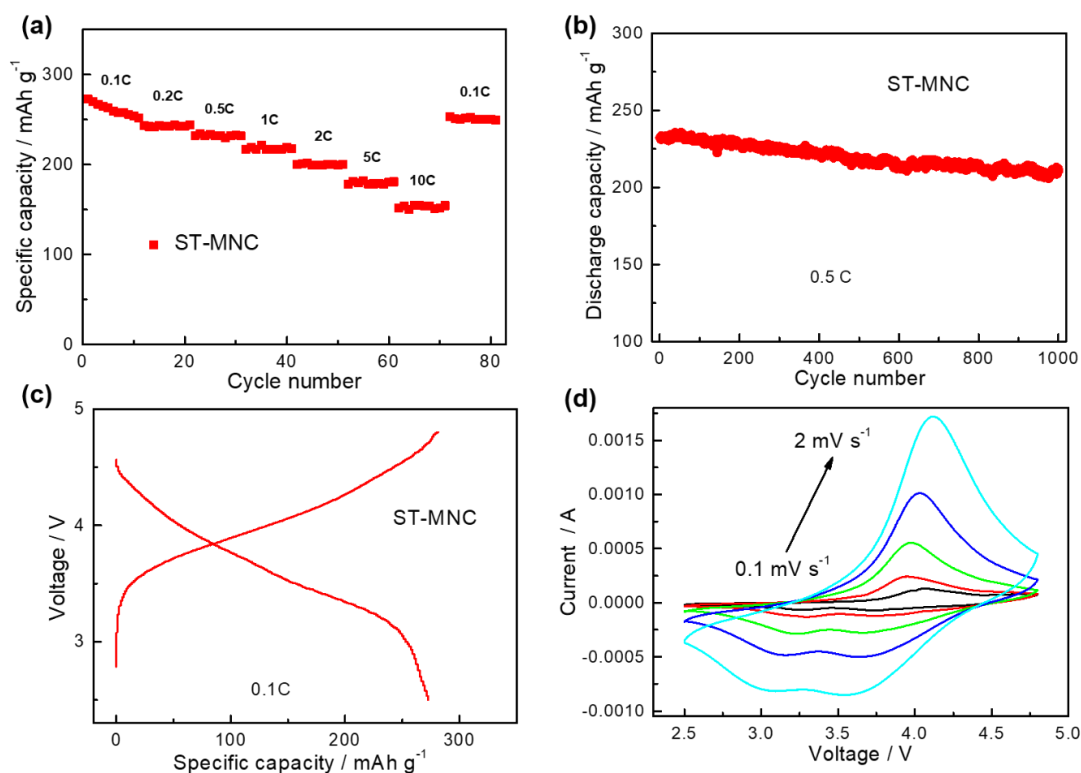

**Fig. S15** Electrochemical performance of ST-MNC: (a) rate performance, (b) cycle performance and (c) charge/discharge profile at 0.1C; (d) CV curves of MNC

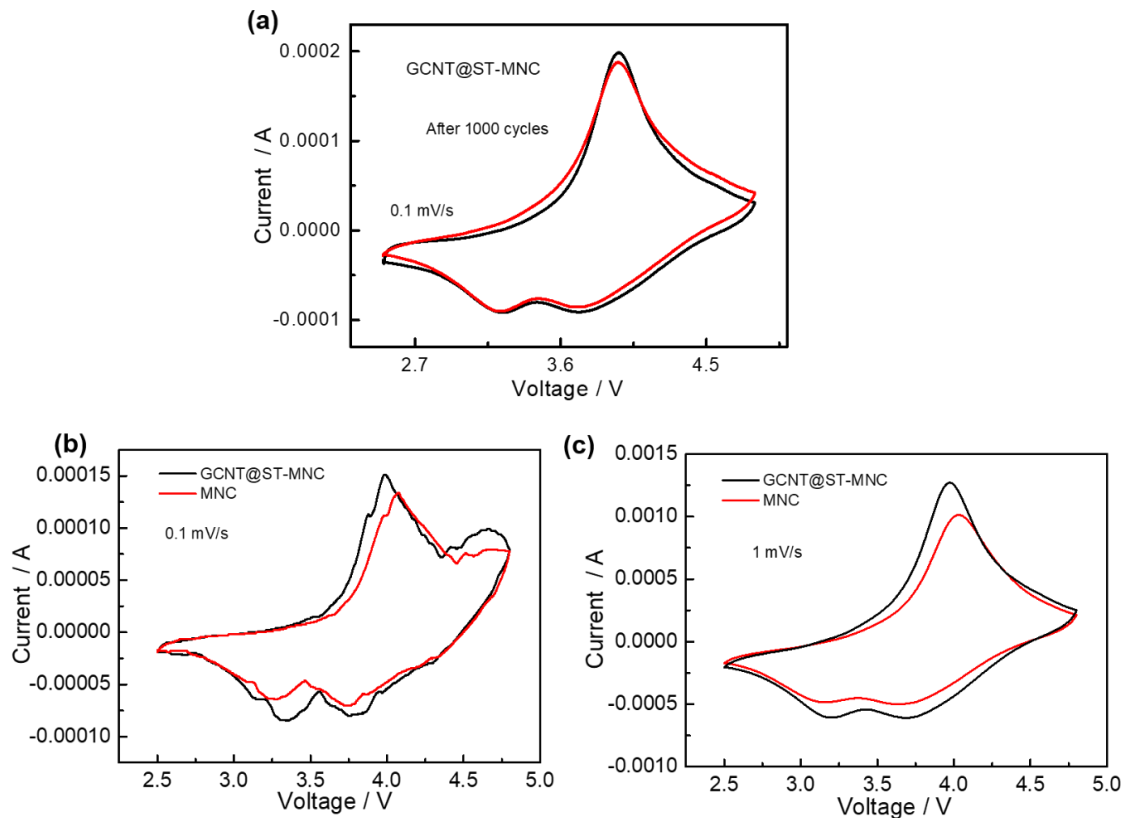

**Fig. S16** CV curves of GCNT@ST-MNC after 1000 cycles (a). CV curve comparison of MNC and GCNT@MNC at scan rates of 0.1 mV/s (b) and 1 mV s<sup>-1</sup> (c)

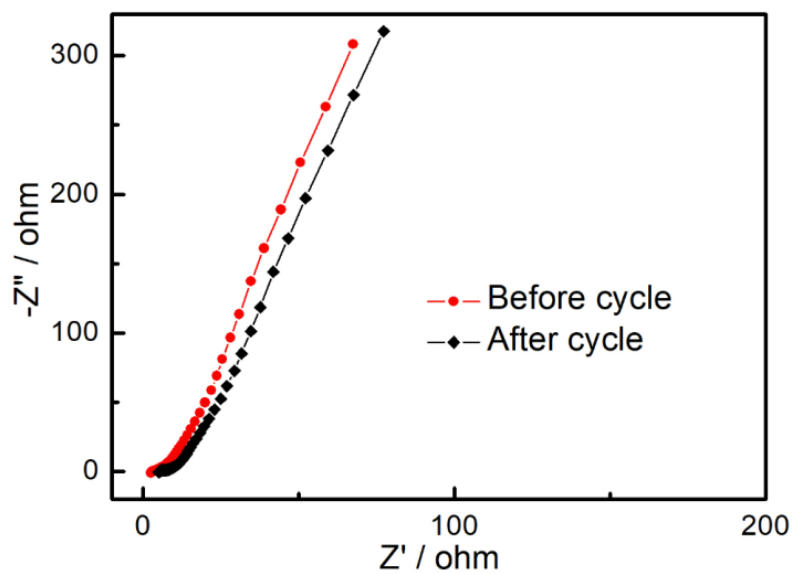

Fig. S17 EIS measurements of full cell before and after 1000 cycles

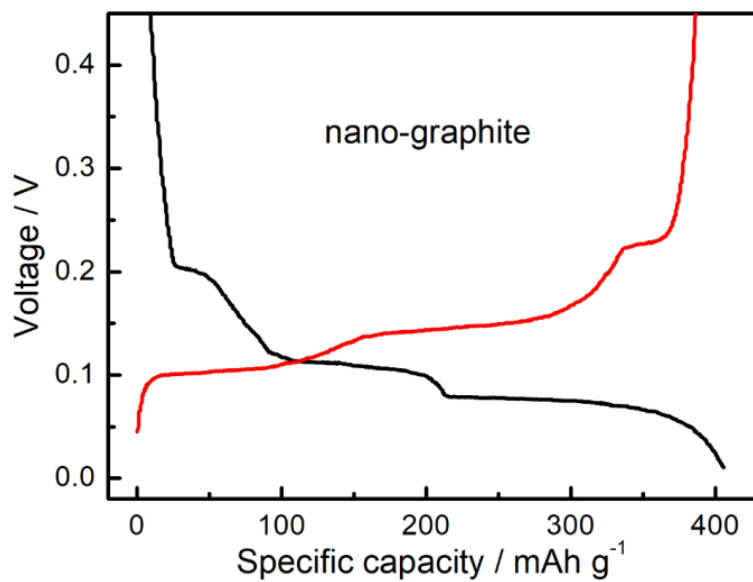

Fig. S18 Galvanostatic charge/discharge curves of nano-graphite anode
